# Supplementary material for: Solid-state supramolecular architectures by p-sulfonatocalix[5]arene with bispyridinium derivatives: factors of spacers and terminal groups
Source: Royal Society of Chemistry journal article supplement (doi:10.1039/b910623e), 2009-11-24
Supplement: b910623e.pdf [file b910623e.pdf]

Electronic Supplementary Information (ESI)

**Table S1** Crystals Structure Data and Details of Structure Refinements for **3**, **4** and **5**.

| Crystal data                                                 | 3                                                                              | 4                                                                             | 5                                                                             |
|--------------------------------------------------------------|--------------------------------------------------------------------------------|-------------------------------------------------------------------------------|-------------------------------------------------------------------------------|
| CCDC deposit No.                                             | CCDC-728424                                                                    | CCDC-728423                                                                   | CCDC-728425                                                                   |
| Empirical fomular                                            | C <sub>84</sub> H <sub>88</sub> N <sub>2</sub> O <sub>46</sub> S <sub>10</sub> | C <sub>47</sub> H <sub>56</sub> N <sub>4</sub> O <sub>26</sub> S <sub>5</sub> | C <sub>42</sub> H <sub>44</sub> N <sub>1</sub> O <sub>23</sub> S <sub>5</sub> |
| Fomular weight                                               | 2182.16                                                                        | 1253.26                                                                       | 1091.08                                                                       |
| Crystal size/mm                                              | 0.30 × 0.26 × 0.20                                                             | 0.24 × 0.20 × 0.16                                                            | 0.24 × 0.22 × 0.16                                                            |
| Crystal system                                               | Monoclinic                                                                     | Monoclinic                                                                    | Monoclinic                                                                    |
| Space group                                                  | C2/c                                                                           | P2 <sub>1</sub> /n                                                            | C2/m                                                                          |
| <i>a</i> /Å                                                  | 31.666(5)                                                                      | 11.4886(19)                                                                   | 31.878(4)                                                                     |
| <i>b</i> /Å                                                  | 19.154(3)                                                                      | 19.653(4)                                                                     | 19.919(2)                                                                     |
| <i>c</i> /Å                                                  | 22.704(4)                                                                      | 29.851(5)                                                                     | 11.1685(13)                                                                   |
| $\alpha$ /°                                                  | 90                                                                             | 90                                                                            | 90                                                                            |
| $\beta$ /°                                                   | 111.471(3)                                                                     | 99.170(3)                                                                     | 96.582(2)                                                                     |
| $\gamma$ /°                                                  | 90                                                                             | 90                                                                            | 90                                                                            |
| Volume/Å <sup>3</sup>                                        | 12816(4)                                                                       | 6654(2)                                                                       | 7044.9(14)                                                                    |
| Z                                                            | 4                                                                              | 4                                                                             | 4                                                                             |
| <i>D</i> <sub>calc</sub> /g cm <sup>-3</sup>                 | 1.131                                                                          | 1.251                                                                         | 1.029                                                                         |
| <i>F</i> (000)                                               | 4536                                                                           | 2616                                                                          | 2268                                                                          |
| $\mu$ (Mo K $\alpha$ )/mm <sup>-1</sup>                      | 0.246                                                                          | 0.250                                                                         | 0.224                                                                         |
| Temperature/K                                                | 294(2)                                                                         | 113(2)                                                                        | 294(2)                                                                        |
| <i>R</i> <sub>int</sub>                                      | 0.0624                                                                         | 0.0535                                                                        | 0.0422                                                                        |
| Range of <i>h</i> , <i>k</i> , <i>l</i>                      | -38/39, -23/23, -28/17                                                         | -9/13, -23/22, -35/35                                                         | -37/25, -23/23, -13/13                                                        |
| $\theta$ <sub>min/max</sub> /°                               | 1.27/26.51                                                                     | 3.13/25.00                                                                    | 1.29/25.01                                                                    |
| Reflections                                                  |                                                                                |                                                                               |                                                                               |
| collected/unique                                             | 34434/13180                                                                    | 37529/11636                                                                   | 17640/6308                                                                    |
| Data/restraints/parameters                                   | 13180/164/710                                                                  | 11636/114/798                                                                 | 6308/445/398                                                                  |
| Goodness of fit on <i>F</i> <sup>2</sup>                     | 0.854                                                                          | 1.022                                                                         | 1.347                                                                         |
| Final <i>R</i> indices [ <i>I</i> > 2 $\sigma$ ( <i>I</i> )] | <i>R</i> <sub>1</sub> = 0.0810<br><i>wR</i> <sub>2</sub> = 0.2109              | <i>R</i> <sub>1</sub> = 0.1002<br><i>wR</i> <sub>2</sub> = 0.2710             | <i>R</i> <sub>1</sub> = 0.1508<br><i>wR</i> <sub>2</sub> = 0.3620             |
| <i>R</i> indices (all data)                                  | <i>R</i> <sub>1</sub> = 0.1942<br><i>wR</i> <sub>2</sub> = 0.2588              | <i>R</i> <sub>1</sub> = 0.1207<br><i>wR</i> <sub>2</sub> = 0.2875             | <i>R</i> <sub>1</sub> = 0.2369<br><i>wR</i> <sub>2</sub> = 0.4337             |
